# Supplementary material for: Ambient electrocatalytic N2 reduction to NH3 by metal fluorides
Source: Royal Society of Chemistry journal article supplement (doi:10.1039/c9ta04706a), 2019-01-01
Supplement: c9ta04706a1.pdf [file c9ta04706a1.pdf]

## Electronic Supplementary Information

### Experimental section

*Materials:* Lanthanum acetate hydrate ( $C_6H_9O_6La \cdot xH_2O$ ), sodium fluoride (NaF), sodium citrate dehydrate ( $C_6H_5Na_3O_7 \cdot 2H_2O$ ), Lithium perchlorate ( $LiClO_4$ ), nitroferricyanide (III) dihydrate ( $Na_2Fe(CN)_5NO \cdot 2H_2O$ ), sodium sulfate ( $Na_2SO_4$ ), and Nafion (5wt%) sodium were purchased from Aladdin Ltd. in Shanghai. Para-(dimethylamino) benzaldehyde ( $C_9H_{11}NO$ ), sodium salicylate ( $C_7H_5O_3Na$ ), hydrazine hydrate ( $N_2H_4 \cdot H_2O$ ), sodium hypochlorite (NaClO), sodium hydroxide (NaOH), hydrochloric acid (HCl), ethanol ( $CH_3CH_2OH$ ), and carbon paper (CP; TGP-H-060) were bought from Beijing Chemical Corporation. The ultrapure water was purified through a Millipore system used throughout all experiments.

*Sample preparation:* Briefly,  $C_6H_9O_6La \cdot xH_2O$  (2 mmol) dissolved in 10 mL water and added 20 mL aqueous solution containing 2 mmol of  $C_6H_5Na_3O_7 \cdot 2H_2O$ . The solution was stirred vigorously for 30 min and 30 mL of NaF (25 mmol) solution was introduced into the above solution. Then the mixture was sealed in a 100 mL Teflon-lined autoclave and maintained at 180 °C for 24 h. After the autoclave cooled down at room temperature naturally, the resulting product was collected by centrifugation, and washed with water and ethanol for several times, followed by drying at 80 °C for 12 h under vacuum conditions. The  $La_2O_3$  was prepared by the above method without addition of NaF, then annealed at 700 °C for 4 h.

*Characterizations:* XRD data were obtained from a LabX XRD-6100 X-ray diffractometer with Cu K $\alpha$  radiation (40 kV, 30 mA) of wavelength 0.154 nm (SHIMADZU, Japan). SEM images were collected on a field-emission scanning electron microscopy (HITACHI SU8100, Tokyo, Japan). TEM images were collected on a transmission electron microscopy (HITACHI H-8100, Tokyo, Japan). AFM images were acquired on a Bruker MultiMode-8 atomic force microscopy (Bruker, USA). Raman spectra were obtained by a Renishaw InVia confocal Raman microprobe under 532 nm laser excitation. XPS measurements were performed on an ESCALABMK II X-ray photoelectron spectrometer using Mg as the exciting source. The absorbance data of spectrophotometer were collected on a SHIMADZU UV-2700 ultraviolet-visible (UV-Vis) spectrophotometer. The ion chromatography data were collected on Thermofisher ICS 5000 plus using the dual temperature heater, injection valve, conductivity detector, AERS 500 Anions suppressor. A gas chromatograph (SHIMADZU, GC-2014C) equipped with MolSieve 5A column and Ar carrier gas was used for  $H_2$  quantifications.  $^1H$  NMR experiments were carried out at 303 K for 5% w/v sample solution in DMSO- $d_6$ . The spectral windows were set to 12.5 kHz (25 ppm), a total of 16 scans were recorded, a  $\pi/2$  pulse length of 11.6  $\mu s$  and 64 K data points with 3 s recycle delay for each sample. Topspin

software version is 3.5 pl6. All  $^1\text{H}$  chemical shifts are referenced to the resonances of DSS standard ( $\delta = 0.00$ ).

*Electrocatalytic  $\text{N}_2$  reduction measurements:* The  $\text{N}_2$  reduction experiments were carried out in a two-compartment cell under ambient condition, which was separated by Nafion 117 membrane. The membrane was treated in  $\text{H}_2\text{O}_2$  (5%) aqueous solution at  $80\text{ }^\circ\text{C}$  for 1 h and dipped in 0.1 M  $\text{H}_2\text{SO}_4$  at  $80\text{ }^\circ\text{C}$  for another 1 h. And finally, the membrane was treated in ultrapure water at  $80\text{ }^\circ\text{C}$  for 6 h. The electrochemical measurements were conducted on a CHI660E electrochemical analyzer (CH Instruments, China). A three-electrode system was used to test the electrocatalytic performance in 0.5 M  $\text{LiClO}_4$  (30 mL) at controllable applied potentials using  $\text{LaF}_3$  deposited on CP ( $\text{LaF}_3/\text{CP}$ ;  $\text{LaF}_3$  loading:  $0.1\text{ mg cm}^{-2}$ ; CP area:  $1 \times 1\text{ cm}^2$ ) as the working electrode,  $\text{Ag}/\text{AgCl}$  (filled with saturated KCl solution) as the reference electrode, and graphite rod as the counter electrode. All potentials were reported on a RHE scale. For comparison,  $\text{La}_2\text{O}_3/\text{CP}$  was also prepared using the same catalyst loading. The potentials reported in this work were converted to RHE scale via calibration with the following equation:  $E\text{ (vs RHE)} = E\text{ (vs Ag/AgCl)} + 0.197 + 0.059 \times \text{pH}$ . For  $\text{N}_2$  reduction experiments, the electrolyte solution (0.5 M  $\text{LiClO}_4$ ) was bubbled with  $\text{N}_2$  for 30 min before the measurement.

*Determination of  $\text{NH}_3$ :* Concentration of produced  $\text{NH}_3$  was determined by spectrophotometry measurement with indophenol indicator.<sup>1</sup> In detail, 4 mL of post-tested solution was got from the electrochemical reaction vessel. Then 50  $\mu\text{L}$  of  $\text{NaClO}$  (4.5%) and  $\text{NaOH}$  (0.75 M), 500  $\mu\text{L}$  of  $\text{C}_7\text{H}_5\text{O}_3\text{Na}$  (0.4 M) and  $\text{NaOH}$  (0.32 M) and 50  $\mu\text{L}$  of 1 wt%  $\text{Na}_2\text{Fe}(\text{CN})_5\text{NO} \cdot 2\text{H}_2\text{O}$  were added into the above solution. Absorbance measurements were performed after 1 h in dark. The concentration-absorbance curve was calibrated using the standard  $\text{NH}_4\text{Cl}$  solution with  $\text{NH}_3$  concentrations of 0.0, 0.15, 0.20, 0.30, 0.50, and  $0.60\text{ }\mu\text{g mL}^{-1}$  in 0.5 M  $\text{LiClO}_4$ . Typically,  $500\text{ }\mu\text{g mL}^{-1}$   $\text{NH}_3$  solution was prepared (0.786 g  $\text{NH}_4\text{Cl}$  dissolved in 0.5 M  $\text{LiClO}_4$ ) and diluted to  $5\text{ }\mu\text{g mL}^{-1}$ . Then, 0.0, 0.3, 0.4, 0.6, 1.0, and 1.2 mL  $\text{NH}_3$  solution with concentration of  $5\text{ }\mu\text{g mL}^{-1}$  were poured into 10 mL test tubes and separately diluted to 10 mL with 0.5 M  $\text{LiClO}_4$ . Identical experiments were conducted using  $\text{Na}_2\text{SO}_4$  electrolyte and concentration-absorbance curve was calibrated using the standard  $\text{NH}_4\text{Cl}$  solution with  $\text{NH}_3$  concentrations of 0.0, 0.05, 0.10, 0.15, 0.20, and  $0.30\text{ }\mu\text{g mL}^{-1}$  in 0.1 M  $\text{Na}_2\text{SO}_4$ . The fitting curves show good linear relation of absorbance value with  $\text{NH}_3$  concentration by three times independent calibrations.

*Determination of  $\text{N}_2\text{H}_4$ :* The  $\text{N}_2\text{H}_4$  presented in the electrolyte was estimated by the method of Watt and Chrisp<sup>2</sup>. A mixed solution of  $\text{C}_9\text{H}_{11}\text{NO}$  (5.99 g),  $\text{HCl}$  (concentrated, 30 mL) and

ethanol (300 mL) was used as a color reagent. Typically, 5 mL electrolyte was removed from the cathodic chamber, after that, added into 5 mL above prepared color reagent and stirring 20 min at room temperature. The absorbance of the resulting solution was measured at 455 nm. The concentration absorbance curves were calibrated using standard  $N_2H_4$  solution with a series of concentrations. The fitting curve shows good linear relation of the absorbance with  $N_2H_4$  concentration ( $y = 0.748 x + 0.033$ ,  $R^2 = 0.999$ ).

*Determination of FE and  $NH_3$  yield:* The FE for  $N_2$  reduction was defined as the amount of electric charge used for synthesizing  $NH_3$  divided the total charge passed through the electrodes during the electrolysis. The total amount of  $NH_3$  produced was measured using colorimetric methods. Assuming three electrons were needed to produce one  $NH_3$  molecule, the FE could be calculated as follows:

$$FE (NH_3) = 3 \times F \times [NH_3] \times V / (17 \times Q) \times 100\%$$

The rate of  $NH_3$  formation was calculated using the following equation:

$$NH_3 \text{ yield} = [NH_3] \times V / (m_{\text{cat.}} \times t)$$

The amount of  $NH_3$  was calculated as follows:

$$m_{NH_3} = [NH_3] \times V$$

Where  $F$  is the Faraday constant,  $[NH_3]$  is the measured  $NH_3$  concentration,  $V$  is the volume of the electrolyte in the cathodic chamber,  $Q$  is the total quantity of applied electricity,  $t$  is the reduction time, and  $m_{\text{cat.}}$  is the loaded mass of catalyst on carbon paper.

The FE of  $H_2$  was calculated as below:

$$FE (H_2) = 2 \times F V_{H_2} \times G \times p_0 / (R \times T \times Q) \times 100\%$$

Where  $V_{H_2}$  is the volume concentration of  $H_2$  in the exhaust gas from the electrochemical cell (GC data),  $G$  is the gas flow rate ( $\text{mL min}^{-1}$ ),  $Q$  is the total quantity of applied electricity,  $p_0 = 1.01 \times 10^5 \text{ Pa}$ ,  $T = 298.15 \text{ K}$ , and  $R = 8.314 \text{ J mol}^{-1} \text{ K}^{-1}$ .

*Calculation details:* First-principles calculations based DFT were performed with the generalized gradient approximation (GGA)<sup>3</sup> in the form of the Perdew, Burke, and Ernzerhof (PBE)<sup>4</sup> exchange-correlation functional, as implemented in the Dmol<sup>3</sup> package.<sup>3,5</sup> A six atom layers (111), (300), (1-10), (100), (001), and (110) surfaces of  $LaF_3$  were modelled with 20 Å vacuum space to avoid the interaction form nearby layers. Layers 1 to 2 are surface layers, layers 3 to 5 are central layers. Structural relaxation was performed until the convergence criteria for energy were set to be  $10^{-5} \text{ eV}$ , and  $0.004 \text{ Ha } \text{Å}^{-1}$  was adopted for the total energy calculations. The  $N_2$  dissociation minimum energy path (MEP) was obtained by LST/QST

tools in DMol<sup>3</sup> code.<sup>6</sup> The Brillouin zone integration was performed with  $3 \times 3 \times 2$   $\Gamma$ -centred Monkhorst-Pack k-point meshes in geometry optimization. We examined a series of facets of LaF<sub>3</sub>, including (300), (111), (1-10), (100), (001), and (110).

Frequencies of each complex were calculated after geometry optimization, and the free energy was obtained as follows:

$$\Delta G = \Delta E + \Delta ZPE - T\Delta S + \Delta G_u + \Delta G_{pH}$$

where  $\Delta E$ ,  $\Delta ZPE$  and  $\Delta S$  are the difference in DFT-calculated total energy change, zero-point energy and the change in entropy between the products and reactants, respectively.  $T$  is the temperature (298.15 K).  $\Delta G_u = -neU$ , where  $n$  is the number of transferred charge, and  $U$  is the electrode potential with respect to the normal hydrogen electrode.  $\Delta G_{pH}$  is the correction H<sup>+</sup> free energy by the concentration, which can be calculated through  $\Delta G_{pH} = 0.059 \times \text{pH}$  (the value of pH is assumed to be zero in this work). The N<sub>2</sub> adsorption energy is defined as:

$$E_{\text{ads}} = E_{\text{N}_2/\text{substrate}} - E_{\text{substrate}} - E_{\text{N}_2}$$

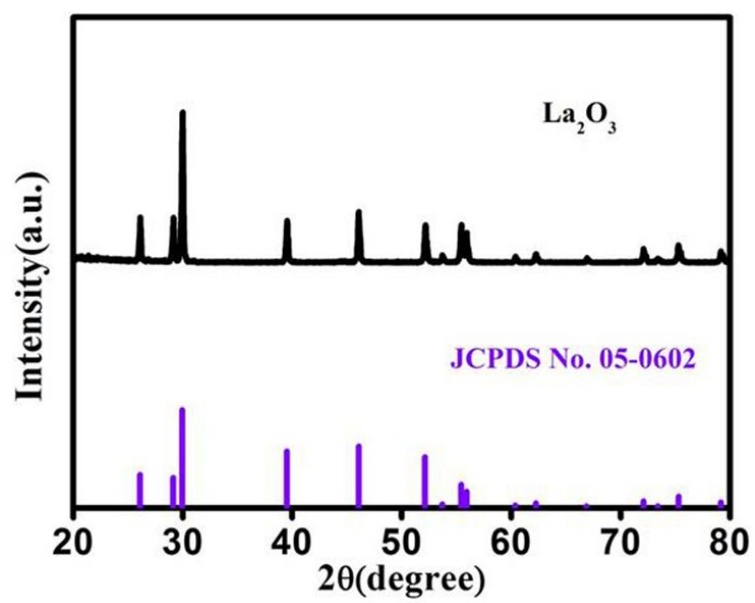

Fig. S1. XRD patterns of  $\text{La}_2\text{O}_3$ .

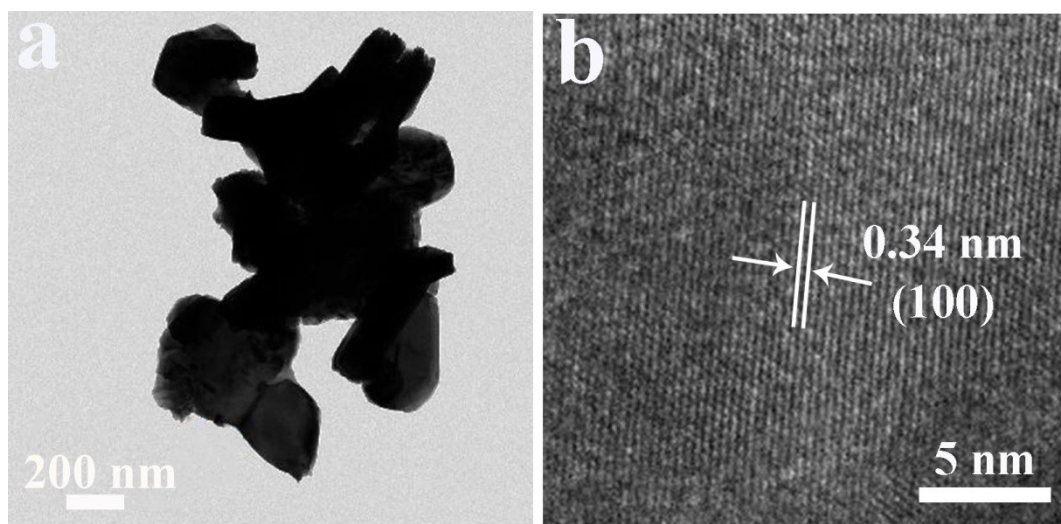

**Fig. S2.** (a) TEM and (b) HRTEM images of  $\text{La}_2\text{O}_3$ .

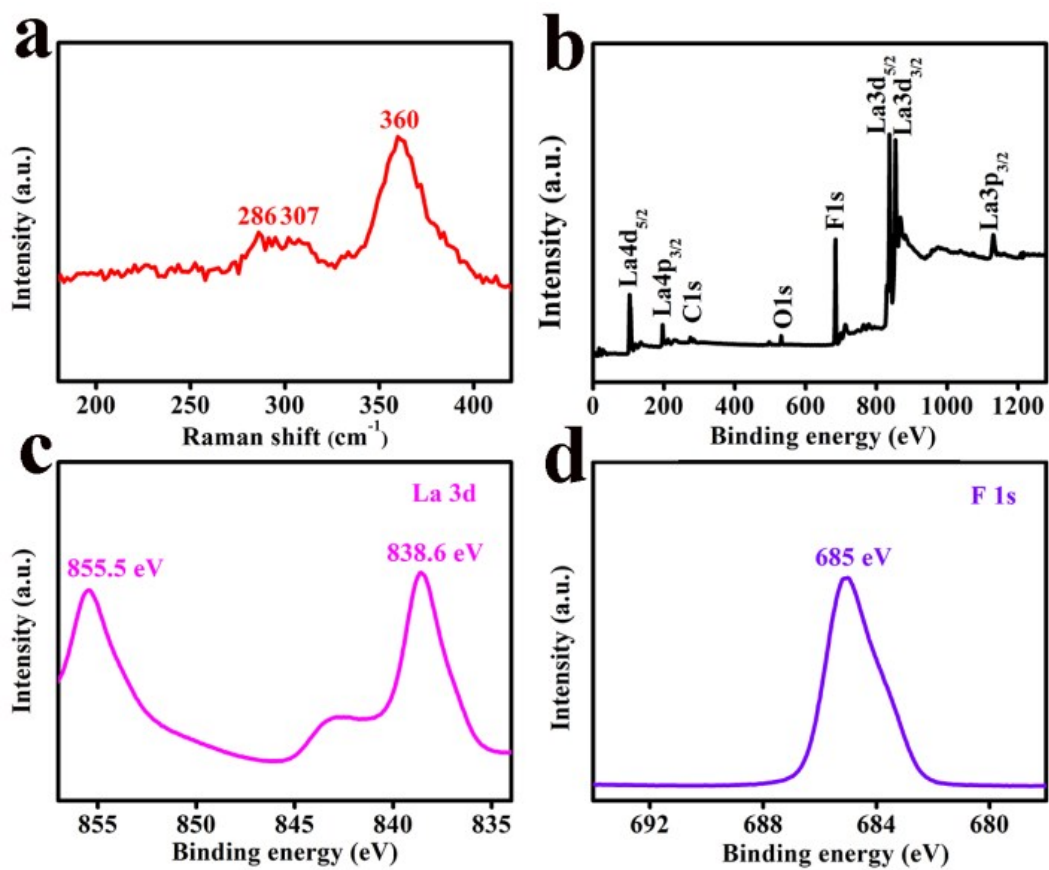

**Fig. S3.** (a) Raman spectrum for LaF<sub>3</sub>. (b) XPS survey spectrum for LaF<sub>3</sub>. XPS spectra in the (c) La 3d and (d) F 1s regions for LaF<sub>3</sub>.

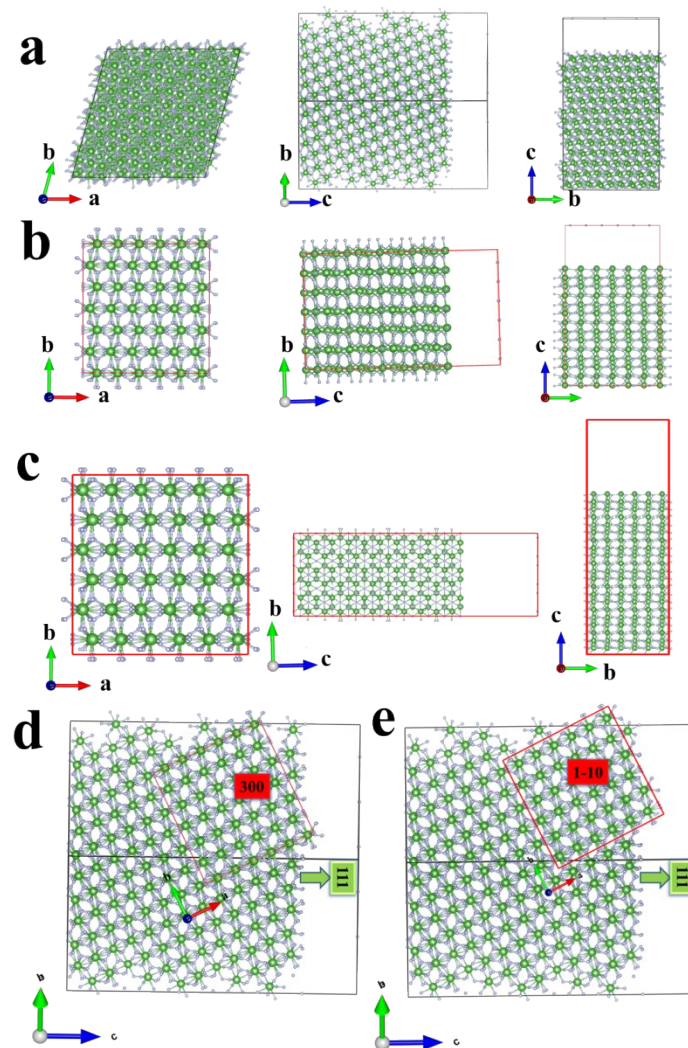

**Fig. S4.** Atomic three-view of (a) (111), (b) (300), and (c) (1-10) surfaces of  $\text{LaF}_3$ . Atomic configuration diagram of perfect march of perpendicular between (c) (300) and (111) surface, (d) (1-10), and (111) surface of  $\text{LaF}_3$ . Based on the HRTEM, SAED and the atom model, the  $\text{LaF}_3$  nanoplate preferably grow along the  $\langle 111 \rangle$  direction. The (111), (300), and (1-10) surfaces are identified as another highly exposed surfaces for the  $\text{LaF}_3$  nanoplate according to the angle formula of hexagonal crystal surface and the atomic model, which are perpendicular to the (111) surface.



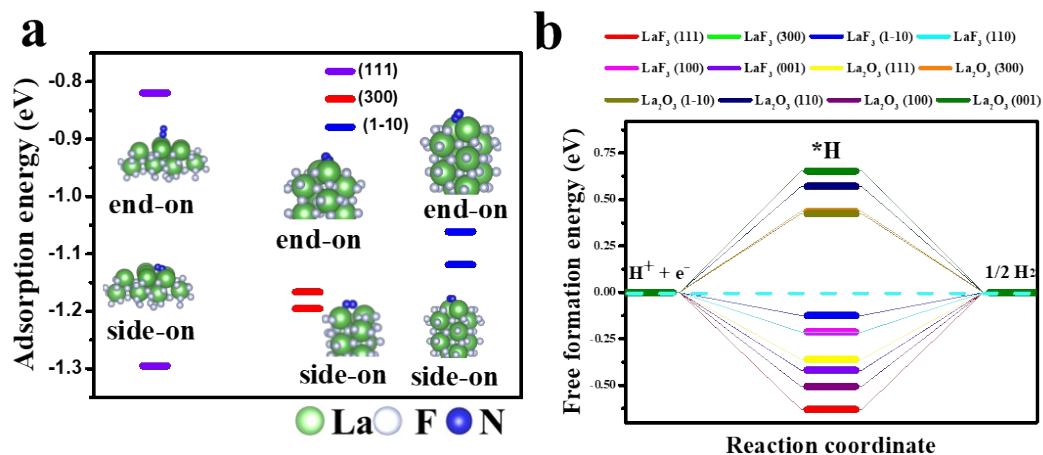

**Fig. S5.** (a) Calculated N<sub>2</sub> adsorption energy for end-on and side-on configurations on LaF<sub>3</sub> (111), (300), and (1-10) surfaces at 298.15 K. (b) DFT-calculated free energy pathways of HER on the (111), (300), (1-10), (100), (110), and (001) surfaces of LaF<sub>3</sub> and La<sub>2</sub>O<sub>3</sub> at surface potential of 0 V under 298.15 K. Insets are the corresponding optimized atomic structures.

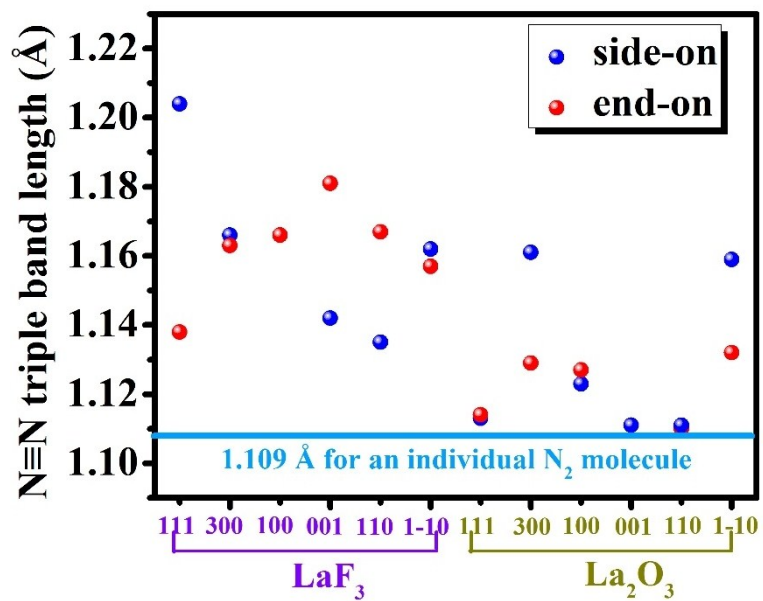

**Fig. S6.** N≡N triple bond lengths after adsorbed in (111), (300), (1-10), (100), (110), and (001) surfaces of LaF<sub>3</sub> and La<sub>2</sub>O<sub>3</sub>. The results indicate that LaF<sub>3</sub> exhibits higher N≡N triple bond activation performance than La<sub>2</sub>O<sub>3</sub>.

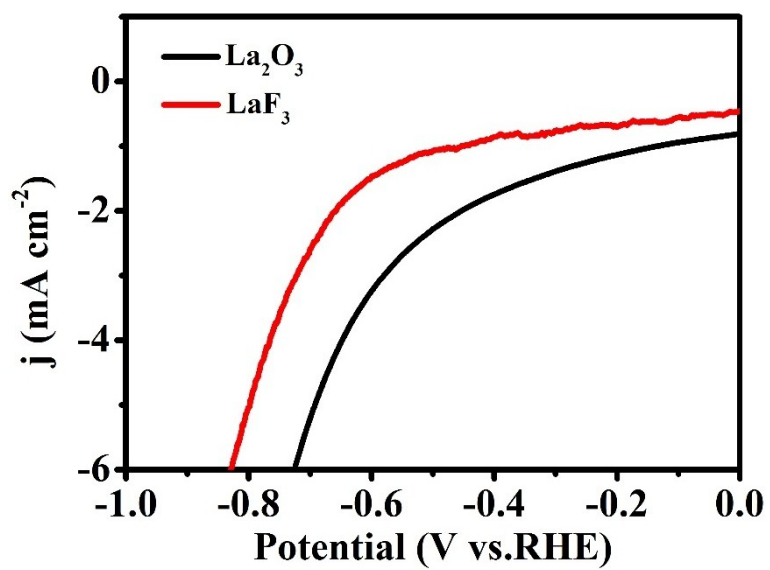

**Fig. S7.** LSV curves of LaF<sub>3</sub>/CP and La<sub>2</sub>O<sub>3</sub>/CP in Ar-saturated 0.5 M LiClO<sub>4</sub> with a scan rate of 2 mV s<sup>-1</sup>.

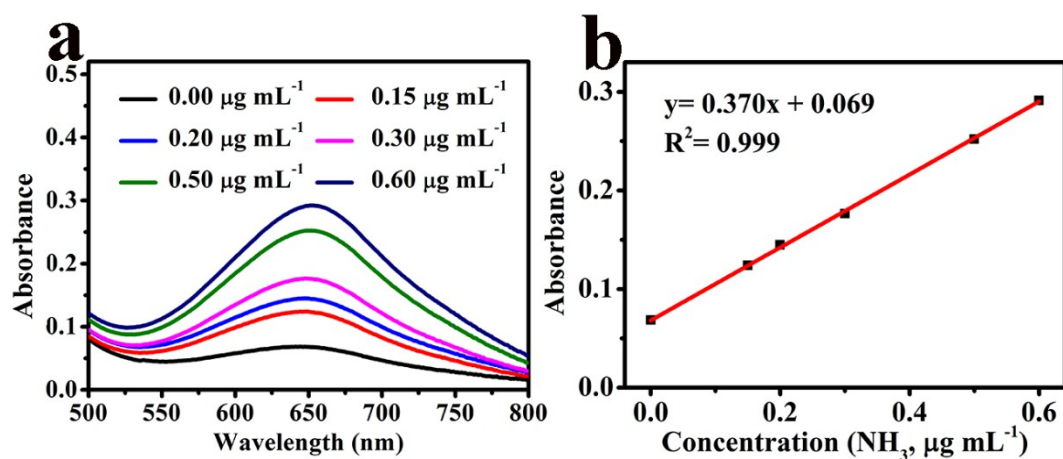

**Fig. S8.** (a) UV-Vis spectra of various  $\text{NH}_3$  concentrations (mother solution: 0.5 M  $\text{LiClO}_4$ ) after incubated for 1 h at room temperature. (b) Calibration curve used for calculation of  $\text{NH}_3$  concentrations.

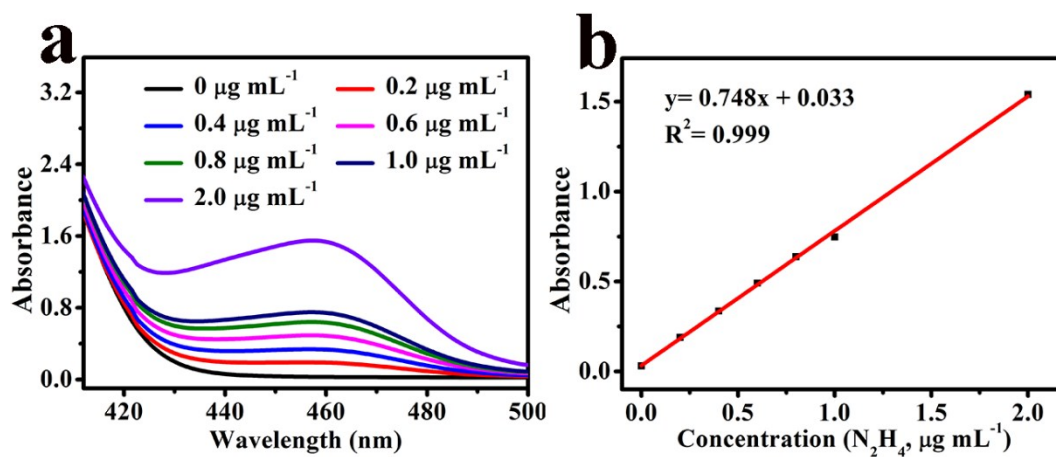

**Fig. S9.** (a) UV-Vis absorption spectra of various  $N_2H_4$  concentrations after incubated for 20 min at room temperature. (b) Calibration curve used for estimation of  $N_2H_4$  concentration.

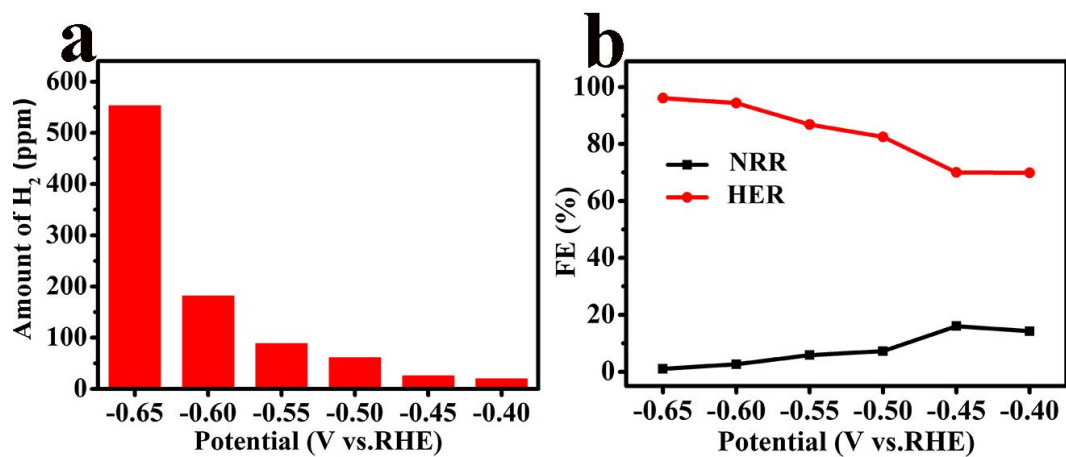

**Fig. S10.** (a) Amount of evolved H<sub>2</sub> on LaF<sub>3</sub>/CP determined by gas chromatography from the headspace of the cell in N<sub>2</sub>-saturated 0.5 M LiClO<sub>4</sub> at various potentials. (b) The calculated FEs of HER and NRR.

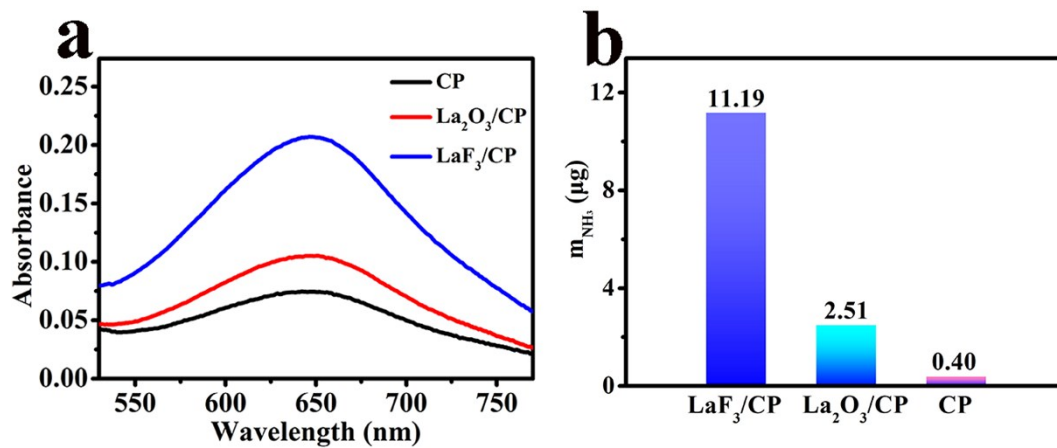

**Fig. S11.** (a) UV-Vis absorption spectra of the electrolytes coloured with indophenol indicator after electrolysis using different electrodes. (b) Amount of NH<sub>3</sub> generated with bare CP, La<sub>2</sub>O<sub>3</sub>/CP, and LaF<sub>3</sub>/CP at -0.45 V for 2 h.

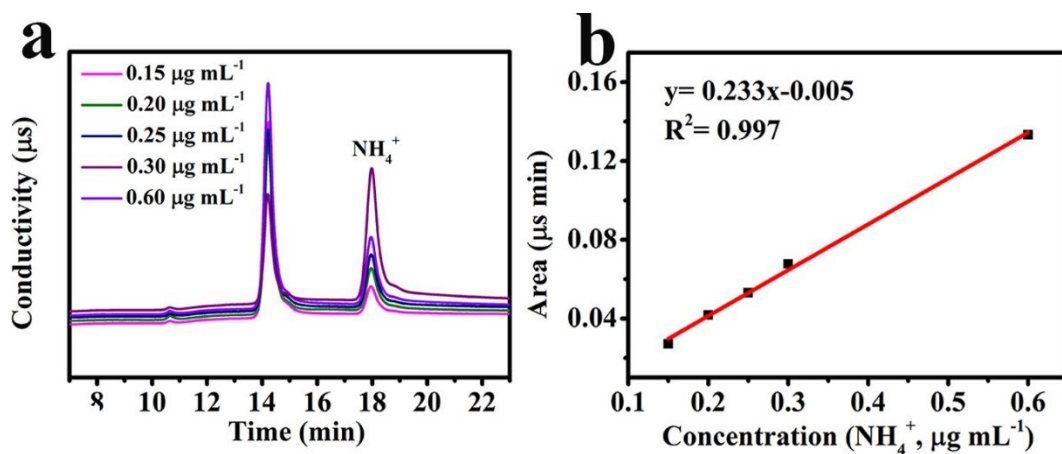

**Fig. S12.** (a) Ion chromatography data of  $\text{NH}_4^+$  with different normal concentrations. (b) The standard curve for the  $\text{NH}_4^+$  solution with different content detected by the ion chromatography.



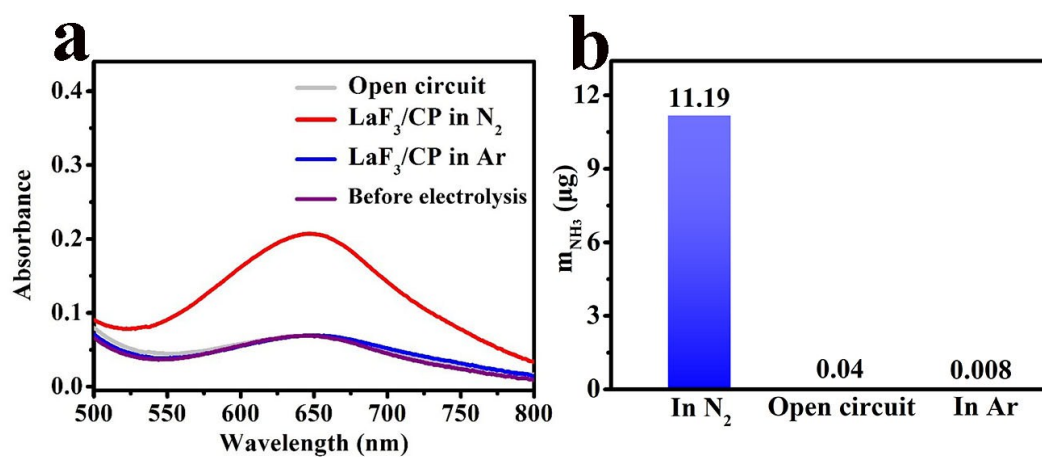

**Fig. S13.** (a) UV-Vis absorption spectra of the electrolytes stained with indophenol indicator after 2 h electrolysis under different conditions: open circuit in N<sub>2</sub>, -0.45 V in N<sub>2</sub>, -0.45 V in Ar, and before electrolysis. (b) Amount of NH<sub>3</sub> generated with LaF<sub>3</sub>/CP under different conditions.

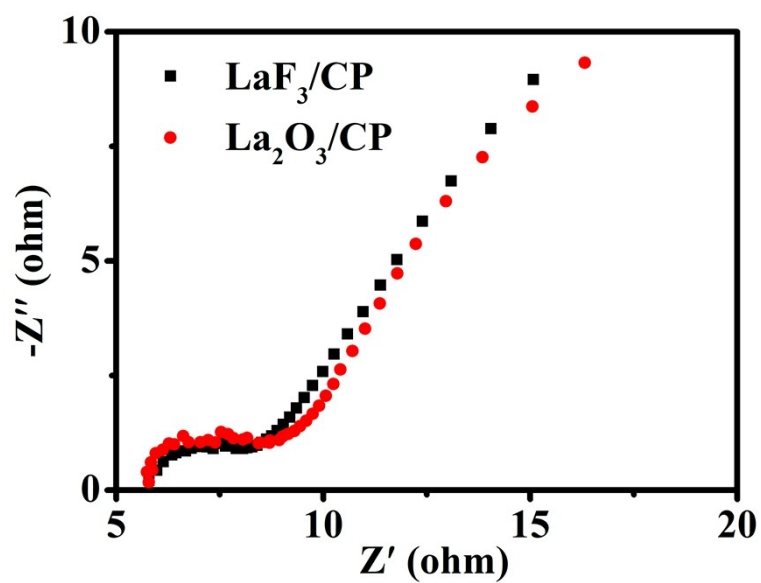

Fig. S14. Nyquist plots of LaF<sub>3</sub>/CP and La<sub>2</sub>O<sub>3</sub>/CP.

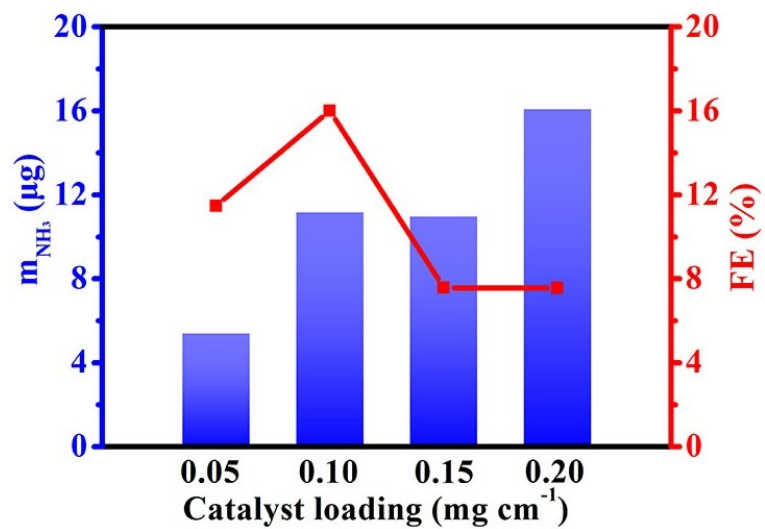

**Fig. S15.** The amount of  $\text{NH}_3$  and FEs for  $\text{LaF}_3/\text{CP}$  with different catalyst loadings.

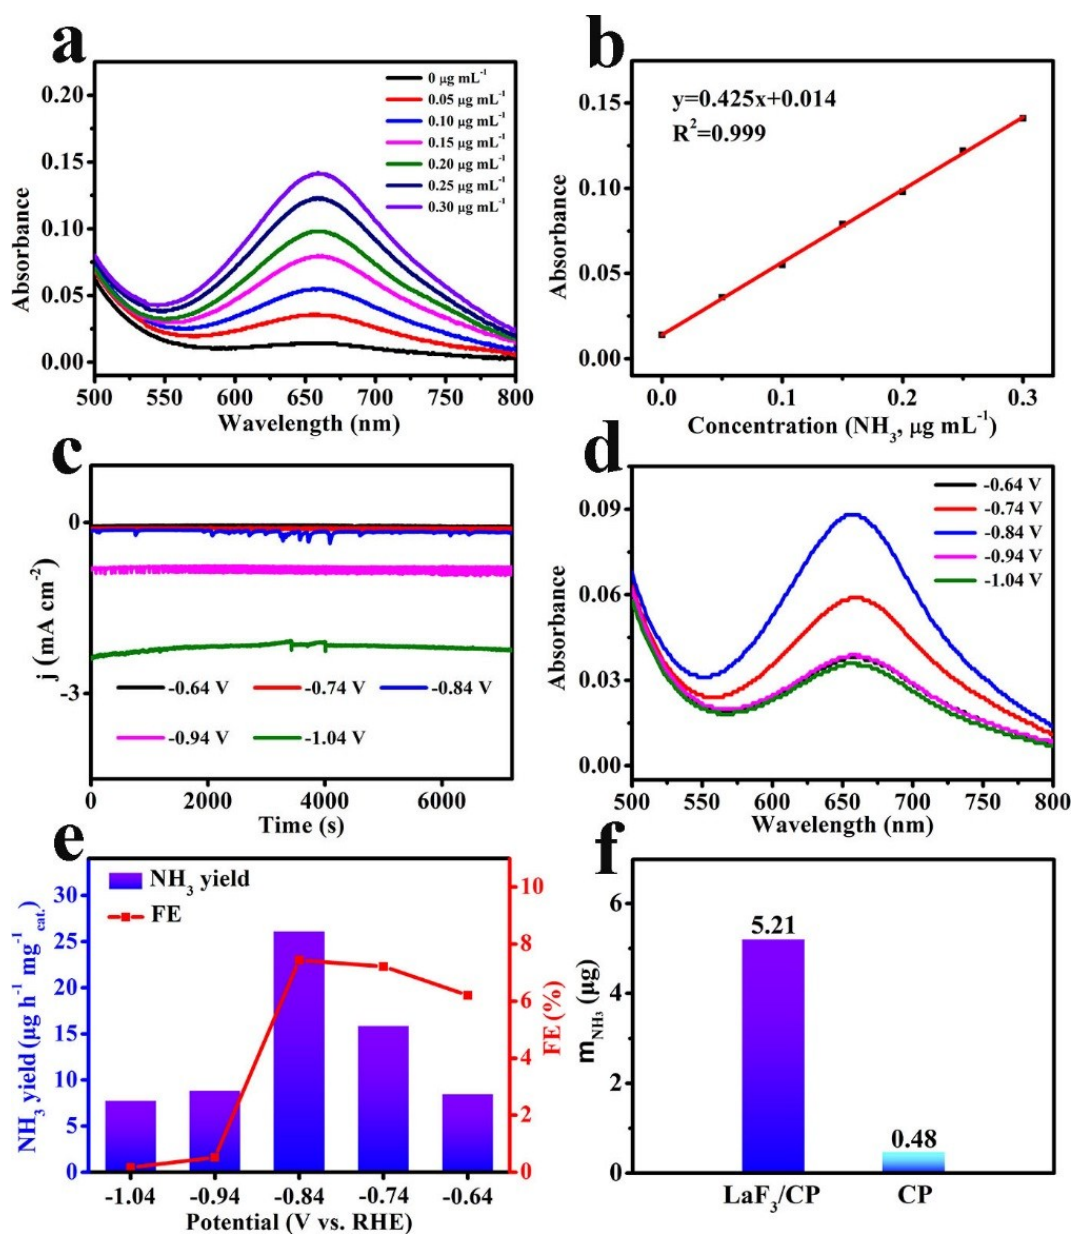

**Fig. S16.** (a) UV-Vis spectra of indophenol assays with  $\text{NH}_3$  concentrations (mother solution: 0.1 M  $\text{Na}_2\text{SO}_4$ ) after incubated for 1 h at room temperature. (b) Calibration curve used for calculation of  $\text{NH}_3$  concentrations. (c) Time-dependent current density curves of  $\text{LaF}_3/\text{CP}$  at various potentials for 2 h in  $\text{N}_2$ -saturated 0.1 M  $\text{Na}_2\text{SO}_4$ . (d) UV-Vis absorption spectra of the electrolytes stained with indophenol indicator after NRR electrolysis at a series of potentials for 2 h. (e)  $\text{NH}_3$  yield rates and FEs of  $\text{LaF}_3/\text{CP}$  for NRR at different potentials. (f) Amount of  $\text{NH}_3$  generated with  $\text{LaF}_3/\text{CP}$  and CP at  $-0.84$  V.

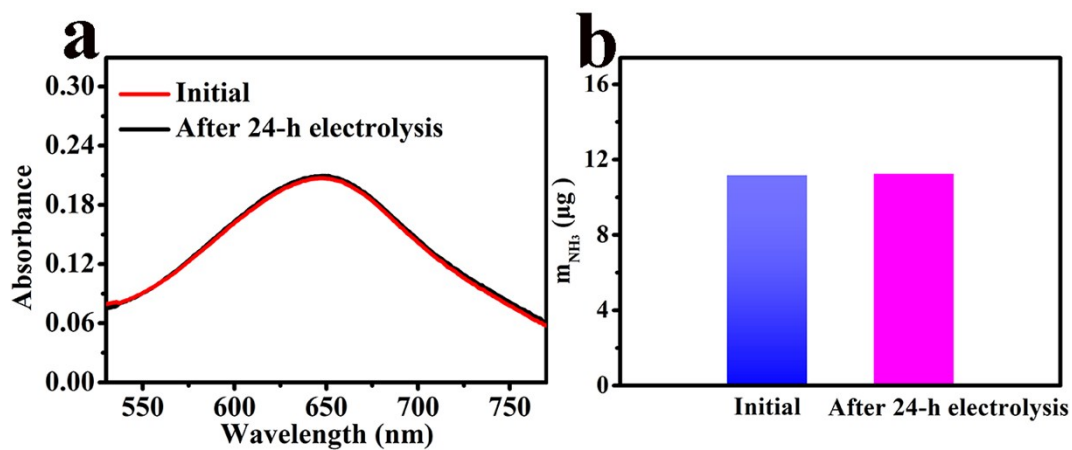

**Fig. S17.** (a) UV-Vis absorption spectra of the electrolyte stained with indophenol indicator after electrolysis at  $-0.45$  V for 2 h over initial  $\text{LaF}_3/\text{CP}$  and  $\text{LaF}_3/\text{CP}$  subjected to 24 h. (b) Amount of  $\text{NH}_3$  generated after 2 h electrolysis over initial  $\text{LaF}_3/\text{CP}$  and  $\text{LaF}_3/\text{CP}$  subjected to 24 h.

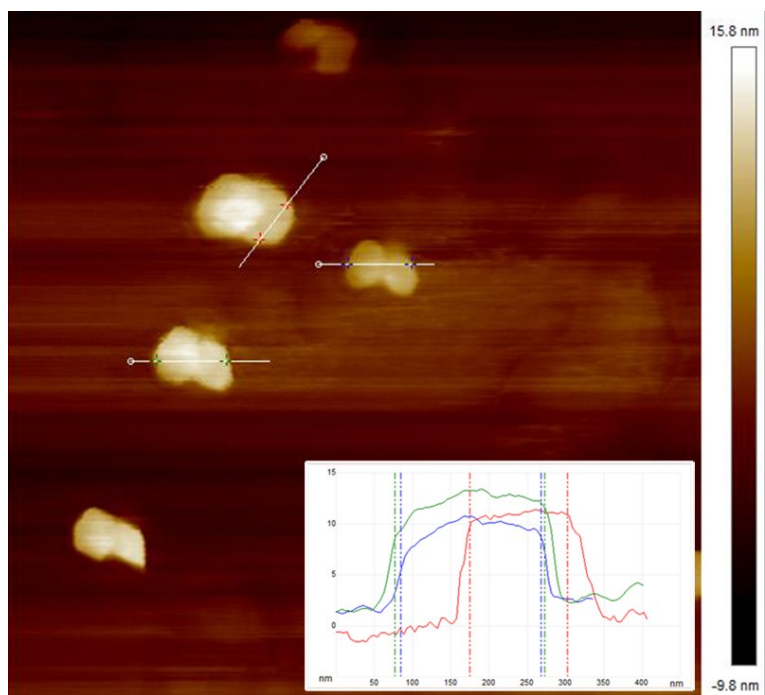

**Fig. S18.** AFM image and cross-section analysis of LaF<sub>3</sub> nanoplate after stability test.

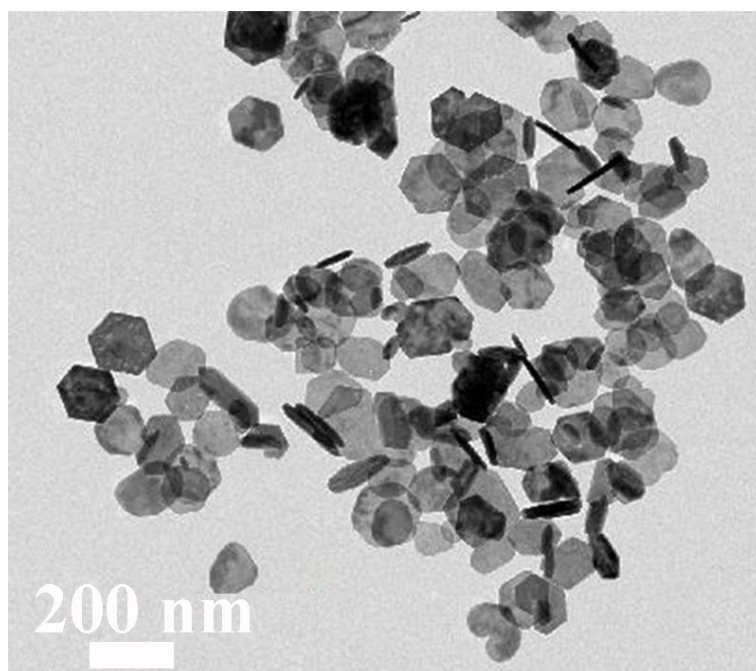

**Fig. S19.** TEM image of LaF<sub>3</sub> nanoplate after stability test.

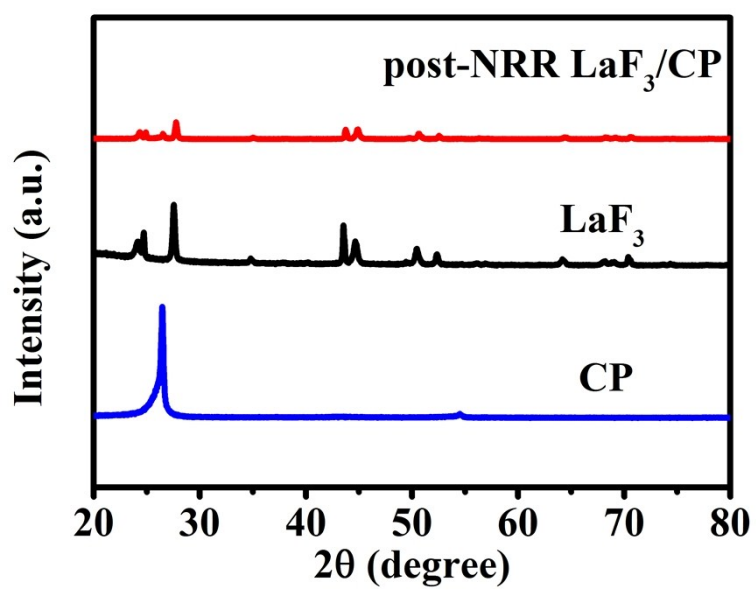

Fig. S20. XRD patterns of LaF<sub>3</sub>/CP after stability test.



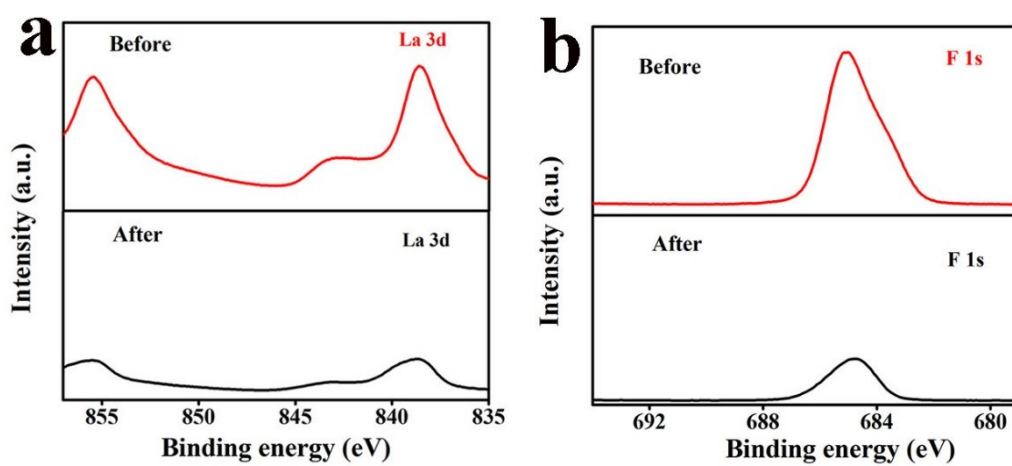

**Fig. S21.** XPS spectra of LaF<sub>3</sub> in the (a) La 3d and (d) F 1s regions before and after stability test.

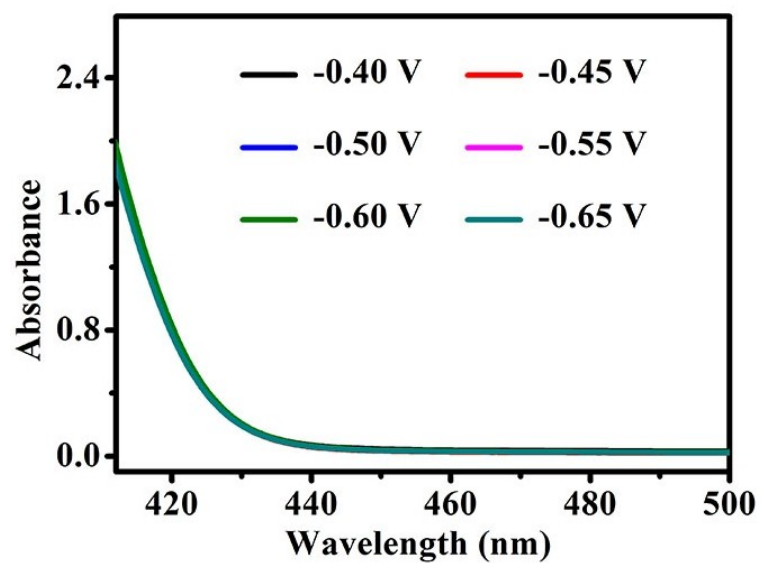

**Fig. S22.** UV-Vis spectra of the electrolyte estimated by the method of Watt and Chrisp (incubated for 20 min) after 2 h electrolysis at a series of potentials under ambient conditions.

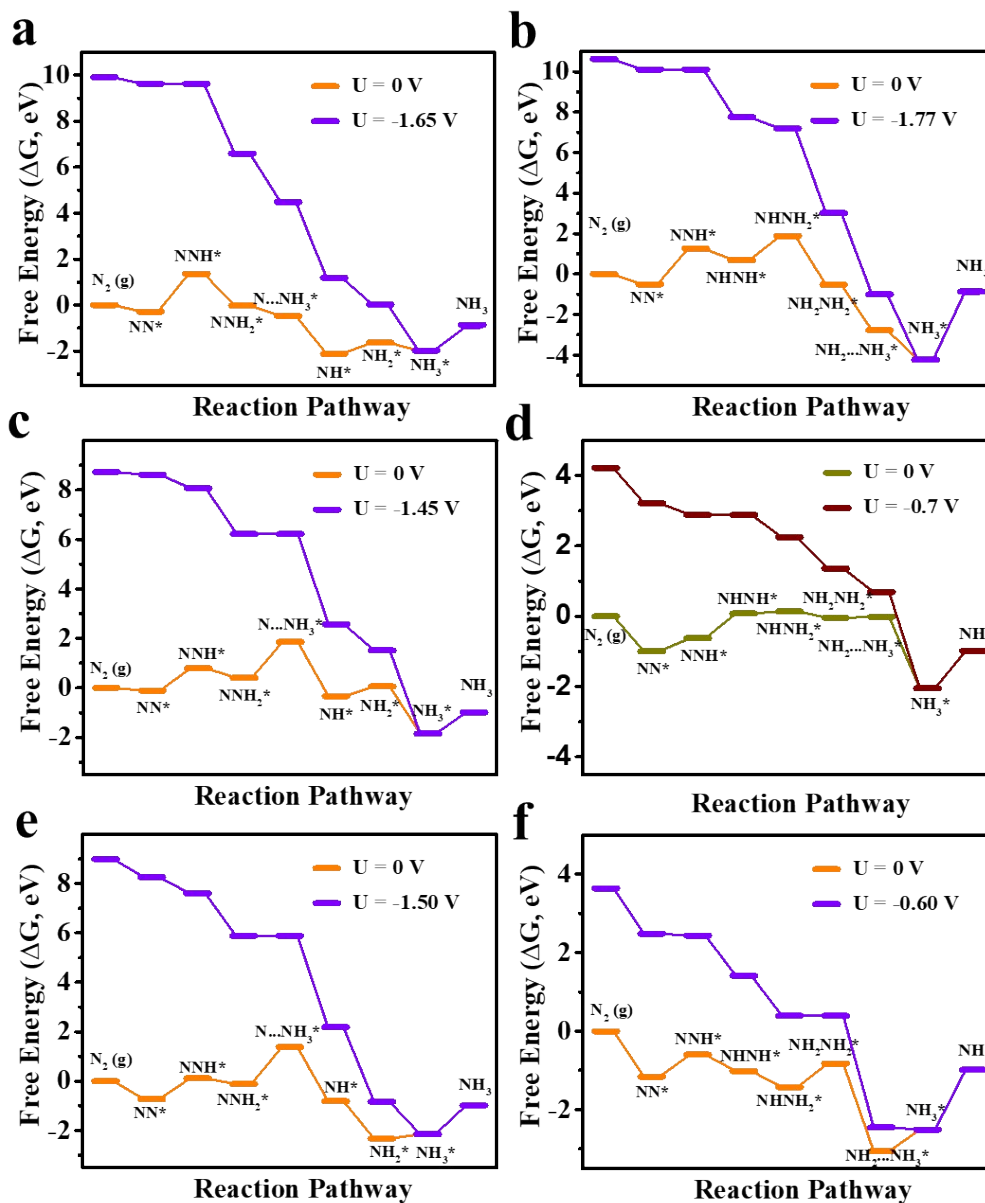

**Fig. S23.** Free energy diagram for the NRR at zero and applied potential (limiting potential) on  $\text{La}_2\text{O}_3(111)$  surface through (a) distal and (b) enzymatic mechanisms, on  $\text{La}_2\text{O}_3(300)$  surface through (c) distal and (d) enzymatic mechanisms and on  $\text{La}_2\text{O}_3(1-10)$  surface through (e) distal and (f) enzymatic mechanisms.

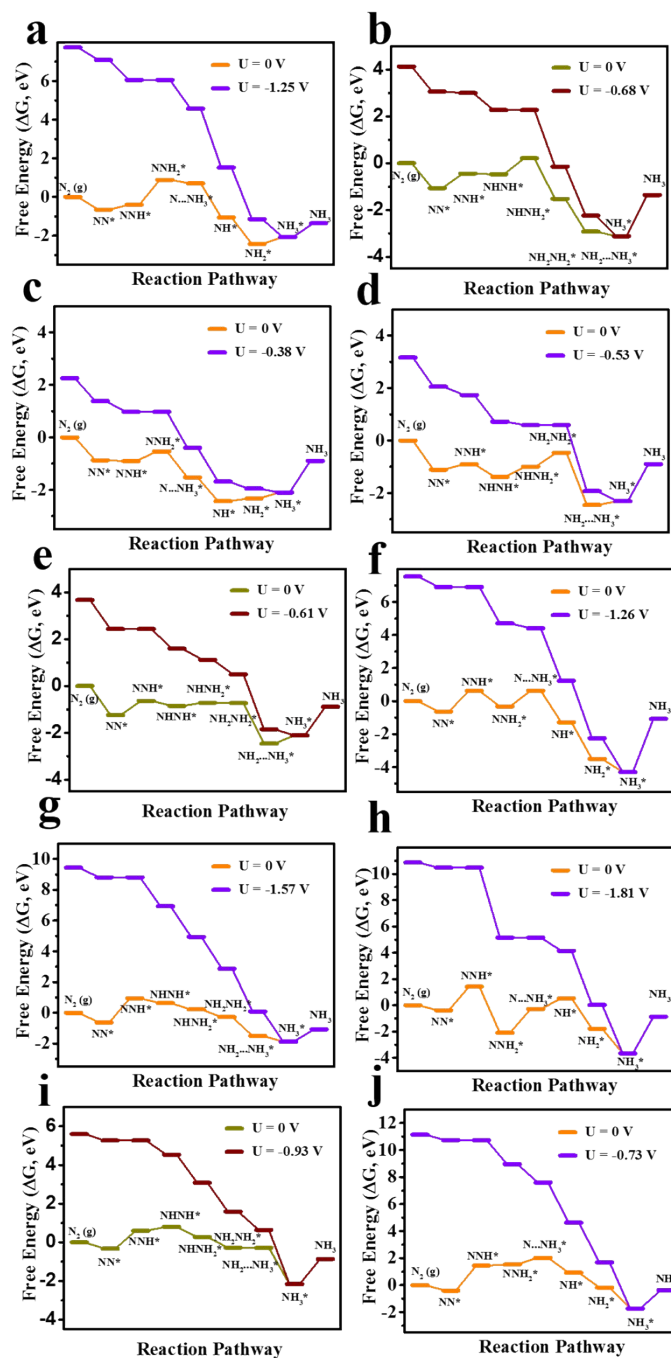

**Fig. S24.** Free energy diagram for the NRR at zero and applied potential (limiting potential) on  $\text{LaF}_3$  (110) surface through (a) distal and (b) enzymatic mechanisms,  $\text{LaF}_3$  (001) surface through (c) distal and (d) enzymatic mechanisms,  $\text{LaF}_3$  (100) surface through (e) enzymatic mechanisms,  $\text{La}_2\text{O}_3$  (110) surface through (f) distal and (g) enzymatic mechanisms,  $\text{La}_2\text{O}_3$  (100) surface through (h) distal and (i) enzymatic mechanisms, and on  $\text{La}_2\text{O}_3$  (001) surface through (j) distal mechanisms.

**Table S1.** Comparison of the catalytic performances of LaF<sub>3</sub>/CP with other non-noble-metal NRR catalysts at ambient conditions.

| Catalyst                                                         | Electrolyte                           | NH <sub>3</sub> yield                                         | FE (%) | Ref.      |
|------------------------------------------------------------------|---------------------------------------|---------------------------------------------------------------|--------|-----------|
| LaF <sub>3</sub> /CP                                             | 0.5 M LiClO <sub>4</sub>              | 55.9 μg h <sup>-1</sup> mg <sup>-1</sup> <sub>cat.</sub>      | 16.0   | This work |
|                                                                  |                                       | 9.1×10 <sup>-11</sup> mol s <sup>-1</sup> cm <sup>-2</sup>    |        |           |
|                                                                  |                                       | 5.59 μg h <sup>-1</sup> cm <sup>-2</sup>                      |        |           |
| β-FeOOH                                                          | 0.5 M LiClO <sub>4</sub>              | 23.32 μg h <sup>-1</sup> mg <sup>-1</sup> <sub>cat.</sub>     | 6.7    | 7         |
| MXene/SSM                                                        | 0.5 M Li <sub>2</sub> SO <sub>4</sub> | 4.72 μg h <sup>-1</sup> cm <sup>-2</sup>                      | 4.62   | 8         |
| PEBCD/C                                                          | 0.5 M Li <sub>2</sub> SO <sub>4</sub> | 1.58 μg h <sup>-1</sup> cm <sup>-2</sup>                      | 2.85   | 9         |
| Mn <sub>3</sub> O <sub>4</sub>                                   | 0.1 M Na <sub>2</sub> SO <sub>4</sub> | 11.6 μg h <sup>-1</sup> mg <sup>-1</sup> <sub>cat.</sub>      | 3.0    | 10        |
| VO <sub>2</sub> hollow<br>microsphere                            | 0.1 M Na <sub>2</sub> SO <sub>4</sub> | 14.85 μg h <sup>-1</sup> mg <sup>-1</sup> <sub>cat.</sub>     | 3.97   | 11        |
| TiO <sub>2</sub>                                                 | 0.1 M Na <sub>2</sub> SO <sub>4</sub> | 9.16×10 <sup>-11</sup> mol s <sup>-1</sup> ·cm <sup>-2</sup>  | 2.5    | 12        |
| SnO <sub>2</sub>                                                 | 0.1 M Na <sub>2</sub> SO <sub>4</sub> | 1.47 × 10 <sup>-10</sup> mol s <sup>-1</sup> cm <sup>-2</sup> | 2.17   | 13        |
| Fe <sub>3</sub> O <sub>4</sub> /Ti                               | 0.1 M Na <sub>2</sub> SO <sub>4</sub> | 5.6×10 <sup>-11</sup> mol s <sup>-1</sup> cm <sup>-2</sup>    | 2.6    | 14        |
| hollow Cr <sub>2</sub> O <sub>3</sub>                            | 0.1 M Na <sub>2</sub> SO <sub>4</sub> | 25.3 μg h <sup>-1</sup> mg <sup>-1</sup> <sub>cat.</sub>      | 6.78   | 15        |
| MoS <sub>2</sub> /CC                                             | 0.1 M Na <sub>2</sub> SO <sub>4</sub> | 8.08×10 <sup>-11</sup> mol s <sup>-1</sup> cm <sup>-2</sup>   | 1.17   | 16        |
| S-doped carbon<br>nanosphere                                     | 0.1 M Na <sub>2</sub> SO <sub>4</sub> | 19.07 μg h <sup>-1</sup> mg <sup>-1</sup> <sub>cat.</sub>     | 7.47   | 17        |
| defect-rich<br>fluorographene                                    | 0.1 M Na <sub>2</sub> SO <sub>4</sub> | 9.3 μg h <sup>-1</sup> mg <sup>-1</sup> <sub>cat.</sub>       | 4.2    | 18        |
| CoO quantum<br>dots                                              | 0.1 M Na <sub>2</sub> SO <sub>4</sub> | 21.5 μg h <sup>-1</sup> mg <sup>-1</sup> <sub>cat.</sub>      | 8.3    | 19        |
| Fe <sub>2</sub> O <sub>3</sub> -CNT                              | KHCO <sub>3</sub>                     | 3.58×10 <sup>-12</sup> mol s <sup>-1</sup> cm <sup>-2</sup>   | 0.15   | 20        |
| N-doped porous<br>carbon                                         | 0.05 M H <sub>2</sub> SO <sub>4</sub> | 23.8 μg h <sup>-1</sup> mg <sup>-1</sup> <sub>cat.</sub>      | 1.42   | 21        |
| (110)-oriented Mo<br>nanofilm                                    | 0.01 M H <sub>2</sub> SO <sub>4</sub> | 3.09×10 <sup>-11</sup> mol s <sup>-1</sup> cm <sup>-2</sup>   | 0.72   | 22        |
| Bi <sub>4</sub> V <sub>2</sub> O <sub>11</sub> /CeO <sub>2</sub> | 0.1 M HCl                             | 23.21 μg h <sup>-1</sup> mg <sup>-1</sup> <sub>cat.</sub>     | 10.16  | 23        |
| Nb <sub>2</sub> O <sub>5</sub> nanofiber                         | 0.1 M HCl                             | 43.6 μg h <sup>-1</sup> mg <sup>-1</sup> <sub>cat.</sub>      | 9.26   | 24        |
| B <sub>4</sub> C                                                 | 0.1 M HCl                             | 26.57 μg h <sup>-1</sup> mg <sup>-1</sup> <sub>cat.</sub>     | 15.95  | 25        |

|                                          |           |                                                          |       |    |
|------------------------------------------|-----------|----------------------------------------------------------|-------|----|
| Fe <sub>3</sub> S <sub>4</sub>           | 0.1 M HCl | 75.4 $\mu\text{g h}^{-1} \text{mg}^{-1}_{\text{cat.}}$   | 6.45  | 26 |
| C <sub>3</sub> N <sub>4</sub>            | 0.1 M HCl | 8.09 $\mu\text{g h}^{-1} \text{mg}^{-1}_{\text{cat.}}$   | 11.59 | 27 |
| Mo <sub>2</sub> C nanorod                | 0.1 M HCl | 95.1 $\mu\text{g h}^{-1} \text{mg}^{-1}_{\text{cat.}}$   | 8.13  | 28 |
| N-doped porous carbon                    | 0.1 M HCl | 15.7 $\mu\text{g h}^{-1} \text{mg}_{\text{cat.}}^{-1}$   | 1.45  | 29 |
| sulfur-doped graphene                    | 0.1 M HCl | 27.3 $\mu\text{g h}^{-1} \text{cm}^{-2}$                 | 11.5  | 30 |
| NP-C-MOF-5                               | 0.1 M HCl | 1.08 $\mu\text{g h}^{-1} \text{mg}^{-1}_{\text{cat.}}$   | -     | 31 |
| $\gamma$ -Fe <sub>2</sub> O <sub>3</sub> | 0.1 M KOH | 0.212 $\mu\text{g h}^{-1} \text{mg}^{-1}_{\text{cat.}}$  | 1.9   | 32 |
| CoP hollow nanocage                      | 1.0 M KOH | 10.78 $\mu\text{g h}^{-1} \text{mg}^{-1}_{\text{cat.}}$  | 7.36  | 33 |
| Fe/Fe <sub>3</sub> O <sub>4</sub>        | 0.1 M PBS | $3.10 \times 10^{-12} \text{ mol s}^{-1} \text{cm}^{-2}$ | 8.29  | 34 |

## References

- 1 D. Zhu, L. Zhang, R. E. Ruther and R. J. Hamers, *Nat. Mater.*, 2013, **12**, 836–841.
- 2 G. W. Watt and J. D. Chrisp, *Anal. Chem.*, 1952, **24**, 2006–2008.
- 3 B. J. Delley, *J. Chem. Phys.*, 1990, **92**, 508–517.
- 4 J. P. Perdew, K. Burke and M. Ernzerhof, *Phys. Rev. Lett.*, 1996, **77**, 3865–3868.
- 5 B. Delley, *J. Chem. Phys.*, 2000, **113**, 7756–7764.
- 6 N. Govind, M. Petersen, G. Fitzgerald, D. King-Smith and J. Andzelm, *Comput. Mater. Sci.*, 2003, **28**, 250–258.
- 7 X. Zhu, Z. Liu, Q. Liu, Y. Luo, X. Shi, A. M. Asiri, Y. Wu and X. Sun, *Chem. Commun.*, 2018, **54**, 11332–11335.
- 8 Y. Luo, G. Chen, L. Ding, X. Chen, L. Ding and H. Wang, *Joule*, 2019, **3**, 1–11.
- 9 G.-F. Chen, X. Cao, S. Wu, X. Zeng, L. Ding, M. Zhu and H. Wang, *J. Am. Chem. Soc.*, 2017, **139**, 9771–9774.
- 10 X. Wu, L. Xia, Y. Wang, W. Lu, Q. Liu, X. Shi and X. Sun, *Small*, 2018, **14**, 1803111.
- 11 R. Zhang, H. Guo, L. Yang, Y. Wang, Z. Niu, H. Huang, H. Chen, L. Xia, T. Li, X. Shi, X. Sun, B. Li and Q. Liu, *ChemElectroChem*, 2019, **6**, 1014–1018.
- 12 R. Zhang, X. Ren, X. Shi, F. Xie, B. Zheng, X. Guo and X. Sun, *ACS Appl. Mater. Interfaces*, 2018, **10**, 28251–28255.
- 13 L. Zhang, X. Ren, Y. Luo, X. Shi, A. M. Asiri, T. Li and X. Sun, *Chem. Commun.*, 2018, **54**, 12966–12969.
- 14 Q. Liu, X. Zhang, B. Zhang, Y. Luo, G. Cui, F. Xie and X. Sun, *Nanoscale*, 2018, **10**, 14386–14389.
- 15 Y. Zhang, W. Qiu, Y. Ma, Y. Luo, Z. Tian, G. Cui, F. Xie, L. Chen, T. Li and X. Sun, *ACS Catal.*, 2018, **8**, 8540–8544.
- 16 L. Zhang, X. Ji, X. Ren, Y. Ma, X. Shi, Z. Tian, A. M. Asiri, L. Chen, B. Tang and X. Sun, *Adv. Mater.*, 2018, **30**, 1800191.
- 17 L. Xia, X. Wu, Y. Wang, Z. Niu, Q. Liu, T. Li, X. Shi, A. M. Asiri and X. Sun, *Small Methods*, 2018, **14**, 1800251.
- 18 J. Zhao, J. Yang, L. Ji, H. Wang, H. Chen, Z. Niu, Q. Liu, T. Li, G. Cui and X. Sun, *Chem. Commun.*, 2019, **55**, 4266–4269.
- 19 K. Chu, Y. Liu, Y. Li, H. Zhang and Y. Tian, *J. Mater. Chem. A*, 2019, **7**, 4389–4394.
- 20 S. Chen, S. Perathoner, C. Ampelli, C. Mebrahtu, D. Su and G. Centi, *Angew. Chem., Int. Ed.*, 2017, **56**, 2699–2703.
- 21 Y. Liu, Y. Su, X. Quan, X. Fan, S. Chen, H. Yu, H. Zhao, Y. Zhang and J. Zhao, *ACS*

- Catal.*, 2018, **8**, 1186–1191.
- 22 D. Yang, T. Chen and Z. Wang, *J. Mater. Chem. A*, 2017, **5**, 18967–18971.
- 23 C. Lv, C. Yan, G. Chen, Y. Ding, J. Sun, Y. Zhou and G. Yu, *Angew. Chem., Int. Ed.*, 2018, **57**, 6073–6076.
- 24 J. Han, Z. Liu, Y. Ma, G. Cui, F. Xie, F. Wang, Y. Wu, S. Gao, Y. Xu and X. Sun, *Nano Energy*, 2018, **52**, 264–270.
- 25 W. Qiu, X. Xie, J. Qiu, W. Fang, R. Liang, X. Ren, X. Ji, G. Cui, A. M. Asiri, G. Cui, B. Tang and X. Sun, *Nat. Commun.*, 2018, **9**, 3485.
- 26 X. Zhao, X. Lan, D. Yu, H. Fu, Z. Liu and T. Mu, *Chem. Commun.*, 2018, **54**, 13010–13013.
- 27 C. Lv, Y. Qian, C. Yan, Y. Ding, Y. Liu, G. Chen and G. Yu, *Angew. Chem., Int. Ed.*, 2018, **57**, 10246–10250.
- 28 X. Ren, J. Zhao, Q. Wei, Y. Ma, H. Guo, Q. Liu, Y. Wang, G. Cui, A. M. Asiri, B. Li, B. Tang and X. Sun, *ACS Central Sci.*, 2019, **5**, 116–121.
- 29 X. Yang, K. Li, D. Cheng, W. Pang, J. Lv, X. Chen, H. Zang, X. Wu, H. Tan, Y. Wang and Y. Li, *J. Mater. Chem. A*, 2018, **6**, 7762–7769.
- 30 L. Xia, J. Yang, H. Wang, R. Zhao, H. Chen, W. Fang, A. M. Asiri, F. Xie, G. Cui and X. Sun, *Chem. Commun.*, 2019, **55**, 3371–3374.
- 31 P. Song, L. Kang, H. Wang, R. Guo and R. M. Wang, *ACS Appl. Mater. Interfaces*, 2019, **11**, 12408–12414.
- 32 J. Kong, A. Lim, C. Yoon, J. H. Jang, H. C. Ham, J. Han, S. Nam, D. Kim, Y.-E. Sung, J. Choi and H. S. Park, *ACS Sustainable Chem. Eng.*, 2017, **5**, 10986–10995.
- 33 W. Guo, Z. Liang, J. Zhao, B. Zhu, K. Cai, R. Zou and Q. Xu, *Small Methods*, 2018, **2**, 1800204.
- 34 L. Hu, A. Khaniya, J. Wang, G. Chen, W. E. Kaden and X. Feng, *ACS Catal.*, 2018, **8**, 9312–9319.
